# Supplementary material for: Exploring causal links in the gut–brain axis: a Mendelian randomization study of gut microbiota, metabolites, and cognition
Source: Royal Society of Chemistry journal article supplement (doi:10.1039/d4fo04366a), 2025-01-01
Supplement: d4fo04366a1.pdf [file d4fo04366a1.pdf]

## Exploring Causal Links in the Gut-Brain Axis: A Mendelian Randomization Study of Gut Microbiota, Metabolites, and Cognition

Sunan Gao <sup>b, c</sup>, Angela Y Xiao <sup>d</sup>, Siyu Zou <sup>c, e</sup>, Tongxu Li <sup>b</sup>, Heming Deng <sup>b</sup>, Yu Wang <sup>a, b, \*</sup>

<sup>a</sup> Center for Applied Statistics, Renmin University of China, Beijing, China

<sup>b</sup> School of Statistics, Renmin University of China, Beijing, China

<sup>c</sup> Bloomberg School of Public Health, Johns Hopkins University, Baltimore, United States

<sup>d</sup> Nuffield Department of Medicine, University of Oxford, Oxford, United Kingdom

<sup>e</sup> School of Public Health, Peking University, Beijing, China

### **\*Corresponding author**

Yu Wang, Ph. D

Tel.: 8610-82500147

E-mail: wangyu80@ruc.edu.cn

Renmin University of China, 59 Zhong Guan Cun Avenue, Hai Dian District, Beijing, PR China, 100872

**Keywords:** Gut microbiome; Metabolites; Cognitive function; Mendelian randomization; Causal inference; Gut-brain axis

## Contents

**Figure S1.** The leave-one-out plots for the causal associations between gut microbiota (A-D) or serum metabolites (E-G) and cognitive phenotypes.

**Figure S2.** The scatter plots for the causal associations between gut microbiota (A-D) or serum metabolites (E-G) and cognitive phenotypes.

**Figure S3.** Forest plots summarizing IVW results of Serum metabolites with a causal relationship to cognitive phenotypes

**Figure S4.** IVW MR associations of gut microbiota (A) and metabolites (B) on different cognitive phenotypes.

**Table S1.** The measurement methods of hot and cold cognition.

**Table S2.** Detailed information on gut microbiota, serum metabolites, and cognitive phenotype genome-wide association studies (GWAS) data.

**Table S3.** MR analysis of Gut Microbiota to different cognitive phenotypes.

**Table S4.** MR analysis of Serum Metabolites to different cognitive phenotypes.

**Table S5.** Reverse MR analysis of cognitive phenotypes to Gut Microbiota or Serum Metabolites.

**Table S6.** The enriched metabolic sets of metabolites that have suggestive causal associations with each cognitive phenotype (IVW<0.05, all associations have been examined by sensitivity analysis).

**Table S7.** Identified Serum Metabolites in enriched significant metabolic pathways for different cognitive phenotypes.

**Table S8.** The mediation effect of serum metabolites in the causal association between gut microbiome and cognitive phenotypes (based on MR IVW estimates).

**Table S9.** The mediation effect of serum metabolites in the causal association between gut microbiome and cognitive phenotypes (based on MR cML-MR estimates).

## Figure Legends:

**Figure S1.** The leave-one-out plots for the causal associations between gut microbiota (A-D) or serum metabolites (E-G) and cognitive phenotypes. (A) The effects from order *Clostridiales id.1863* on cognitive traits; (B) The effects from genus *RikenellaceaeRC9gutgroup id.11191* on non-cognitive traits; (C) The effects from genus *Desulfovibrio id.3173* on non-cognitive traits; (D) The effects from genus *Actinomyces id.423* on response Inhibition; (E) The effects from Acetylcarnitine on cognitive traits; (F) The effects from 1-linoleoylglycerophosphoethanolamine on cognitive traits; (G) The effects from hypoxanthin on non-cognitive traits.

**Figure S2.** The scatter plots for the causal associations between gut microbiota (A-D) or serum metabolites (E-G) and cognitive phenotypes. (A) The effects from order *Clostridiales id.1863* on cognitive traits; (B) The effects from genus *RikenellaceaeRC9gutgroup id.11191* on non-cognitive traits; (C) The effects from genus *Desulfovibrio id.3173* on non-cognitive traits; (D) The effects from genus *Actinomyces id.423* on response Inhibition; (E) The effects from Acetylcarnitine on cognitive traits; (F) The effects from 1-linoleoylglycerophosphoethanolamine on cognitive traits; (G) The effects from hypoxanthin on non-cognitive traits.

**Figure S3.** Forest plots summarizing IVW results of Serum metabolites with a causal relationship to cognitive phenotypes (A: cognitive and non-cognitive traits; B: emotion recognition, response inhibition, working memory). The estimates of the selected association are in the same direction under different MR Methods.

**Figure S4.** IVW MR associations of gut microbiota (A) and metabolites (B) on different cognitive phenotypes. (Exposure has suggestive causal associations with at least one cognitive feature,  $IVW < 0.05$ ). Significance label was based on IVW results (\*\*\*:  $P < 0.001$ , \*\*:  $P < 0.01$ , \*:  $P < 0.05$ )

**Figure S1. The leave-one-out plots for the causal associations between gut microbiota (A-D) or serum metabolites (E-G) and cognitive phenotypes.** (A) The effects from order *Clostridiales id.1863* on cognitive traits; (B) The effects from genus *RikenellaceaeRC9gutgroup id.11191* on non-cognitive traits; (C) The effects from genus *Desulfovibrio id.3173* on non-cognitive traits; (D) The effects from genus *Actinomyces id.423* on response Inhibition; (E) The effects from Acetylcarnitine on cognitive traits; (F) The effects from 1-linoleoylglycerophosphoethanolamine on cognitive traits; (G) The effects from hypoxanthin on non-cognitive traits.

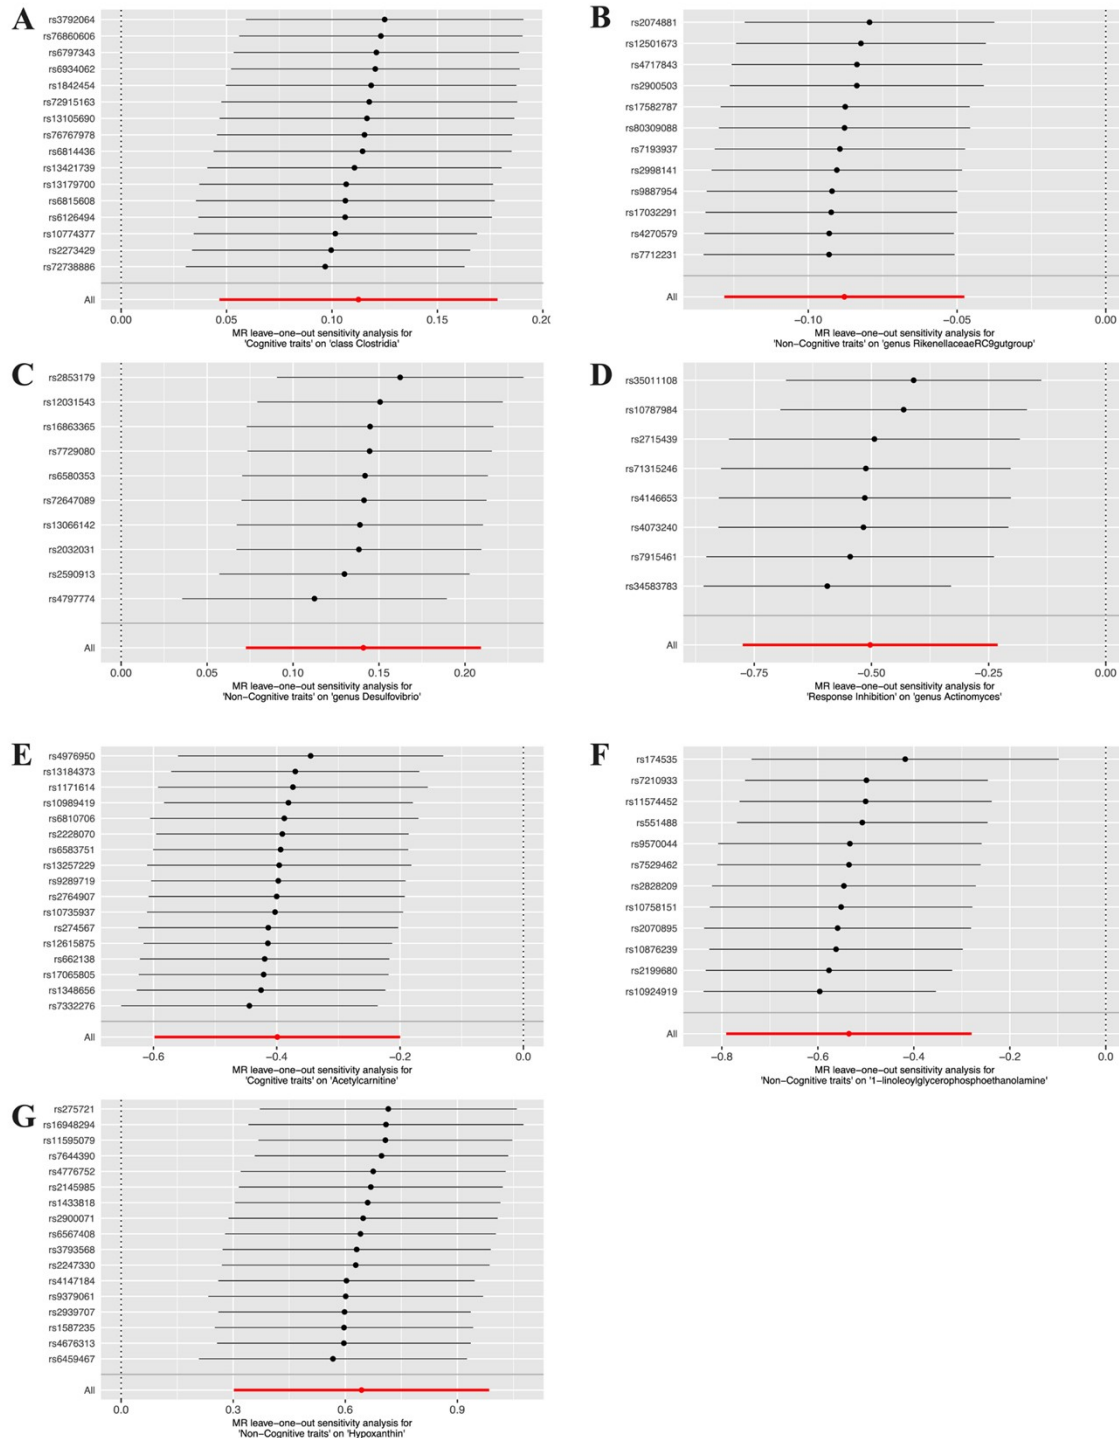

**Figure S2. The scatter plots for the causal associations between gut microbiota (A-D) or serum metabolites (E-G) and cognitive phenotypes.** (A) The effects from order *Clostridiales id.1863* on cognitive traits; (B) The effects from genus *RikenellaceaeRC9gutgroup id.11191* on non-cognitive traits; (C) The effects from genus *Desulfovibrio id.3173* on non-cognitive traits; (D) The effects from genus *Actinomyces id.423* on response Inhibition; (E) The effects from Acetylcarnitine on cognitive traits; (F) The effects from 1-linoleoylglycerophosphoethanolamine on cognitive traits; (G) The effects from hypoxanthin on non-cognitive traits.

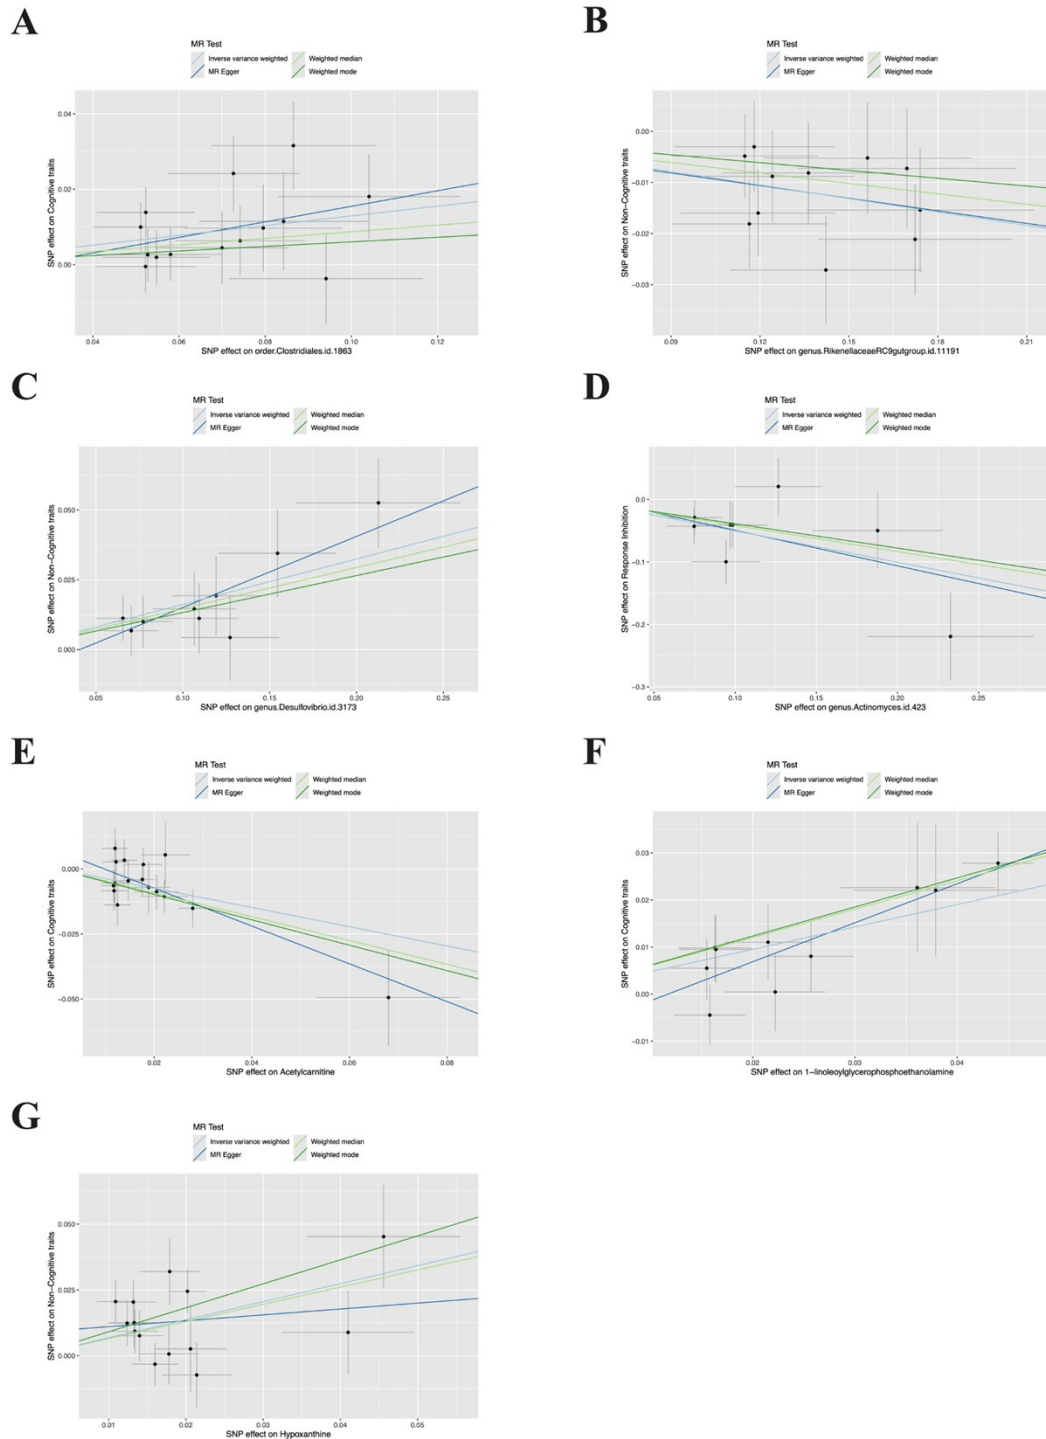

**Figure S3 Forest plots summarizing IVW results of Serum metabolites with a causal relationship to cognitive phenotypes (A: cognitive and non-cognitive traits; B: emotion recognition, response inhibition, working memory). The estimates of the selected association are in the same direction under different MR Methods.**

**A**

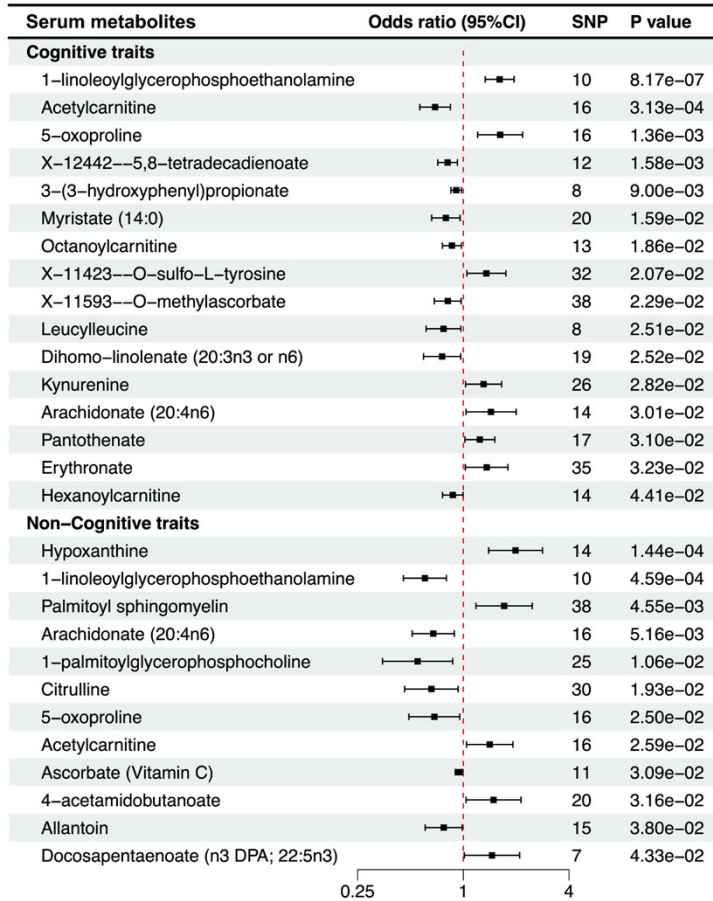

**B**

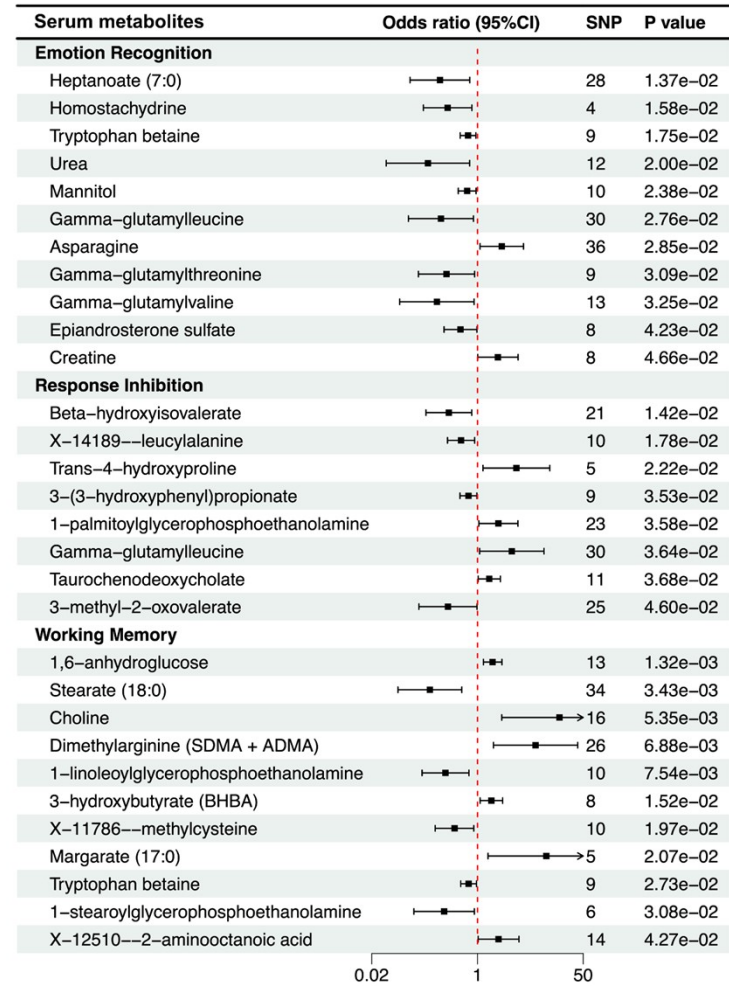

**Figure S4 IVW MR associations of gut microbiota (A) and metabolites (B) on different cognitive phenotypes.** (Exposure has suggestive causal associations with at least one cognitive feature, IVW<0.05). Significance label was based on IVW results (\*\*\*: P<0.001, \*\*: P<0.01, \*: P<0.05)

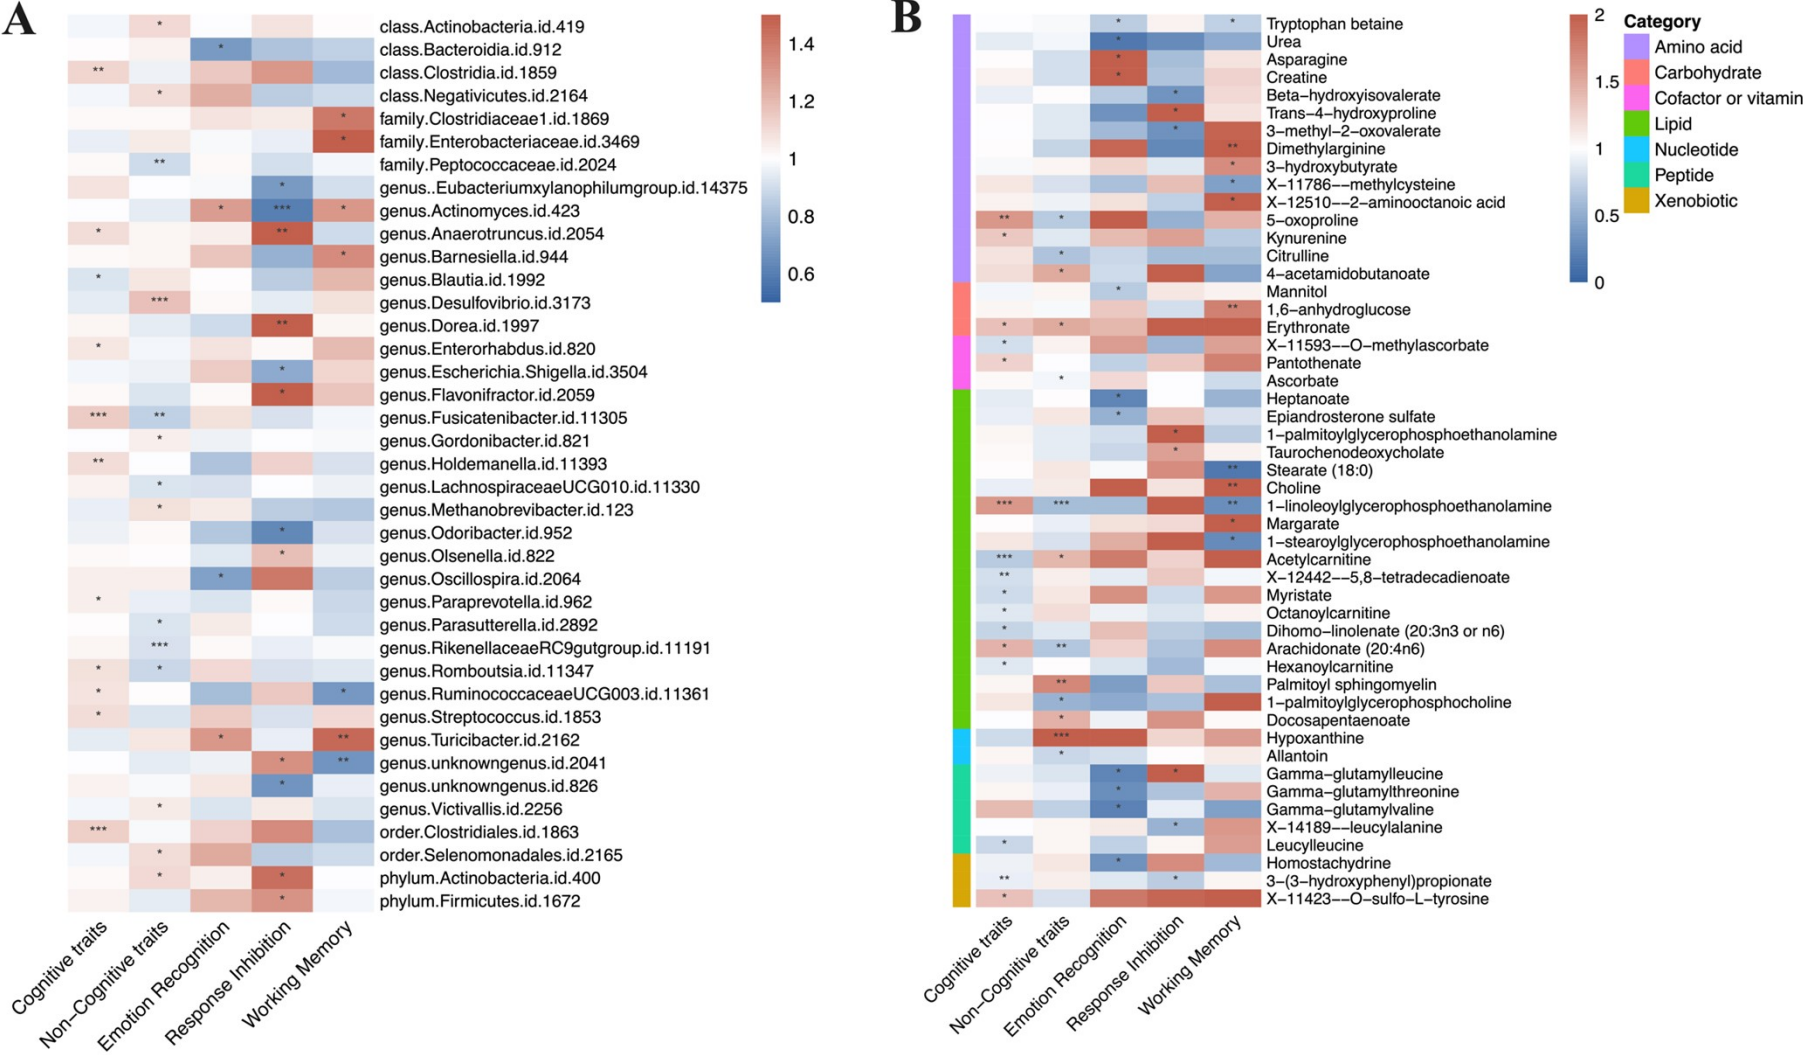

**Table Legends:**

**Table S1.** The measurement methods of hot and cold cognition.

**Table S2.** Detailed information on gut microbiota, serum metabolites, and cognitive phenotype genome-wide association studies (GWAS) data.

**Table S3.** MR analysis of Gut Microbiota to different cognitive phenotypes.

**Table S4.** MR analysis of Serum Metabolites to different cognitive phenotypes.

**Table S5.** Reverse MR analysis of cognitive phenotypes to Gut Microbiota or Serum Metabolites.

**Table S6.** The enriched metabolic sets of metabolites that have suggestive causal associations with each cognitive phenotype (IVW<0.05, all associations have been examined by sensitivity analysis).

**Table S7.** Identified Serum Metabolites in enriched significant metabolic pathways for different cognitive phenotypes.

\* Detailed results pertaining to Tables S3-S5 are presented in the accompanying "Supplementary material - Table S3-5" file due to the extensive data.



**Table S1. The measurement methods of hot and cold cognition**

| Cognitive measurement      | Details                                                                                                                                                                                                                                                                                                                                                                                                                                                                                                                                                                                                                                                                                                                                                                                                                                                                                                                                                                                                                                                                 |
|----------------------------|-------------------------------------------------------------------------------------------------------------------------------------------------------------------------------------------------------------------------------------------------------------------------------------------------------------------------------------------------------------------------------------------------------------------------------------------------------------------------------------------------------------------------------------------------------------------------------------------------------------------------------------------------------------------------------------------------------------------------------------------------------------------------------------------------------------------------------------------------------------------------------------------------------------------------------------------------------------------------------------------------------------------------------------------------------------------------|
| <b>Working Memory</b>      | Working memory, the ability to temporarily store and manipulate information, was assessed using the N-back task (two-back condition), a widely used measure (Kirchner, 1958; Meule, 2017; Gajewski et al., 2018; Slaney et al., 2023). In each trial, a number is briefly presented (500 ms), and participants must report whether it matches the number presented two trials earlier. This task comprises 48 trials without feedback (8 of which are matches), preceded by 12 practice trials with feedback. The primary outcome measure was the discriminability index ( $d'$ ), an overall performance estimate where a higher $d'$ indicates better working memory. Of the 3312 participants assessed with cognitive tasks at age 24, 182 did not provide any data, and 70 were omitted due to negative $d'$ scores and/or not responding to more than 50% of the trials, resulting in a final sample of 3242 (mean = 2.75, SD = 0.81). Individuals who did not respond on more than 50% of trials or had a negative $d'$ were excluded from the analyses (N = 78). |
| <b>Emotion recognition</b> | Emotion recognition, the ability to identify emotion expressions, was assessed using a six-alternative forced choice (6AFC) emotion recognition task (Penton-Voak et al., 2012). This task, comprising 96 trials (16 for each emotion), measures the ability to identify emotions in facial expressions. In each trial, a face displaying one of six basic emotions (happiness, sadness, anger, fear, disgust, or surprise) is briefly presented (200 ms) and then immediately covered up. Participants then report which emotion was displayed using six labels. Each emotion is presented at eight levels of intensity. The primary outcome measure was the number of facial emotions accurately identified (hits), with a higher score indicating better emotion recognition. Emotion recognition data were available for 3368 participants (mean = 0.69, SD = 0.08).                                                                                                                                                                                                |
| <b>Response inhibition</b> | Response inhibition, the ability to suppress a prepotent response, was assessed using the Stop-Signal Task (Logan et al., 1984). The task comprised 256 trials, with a 4:1 ratio of trials without stop signals to those with stop signals. In each trial, participants were shown a letter (X or O) for 1,000 ms and asked to identify it as quickly as possible. On 25% of the trials, a stop signal (a tone) was presented after the letter, requiring participants to inhibit their response. Mean response times were calculated, and the primary outcome measure was the stop-signal reaction time (SSRT), a reliable indicator of inhibitory control. Shorter SSRTs signify faster inhibition. SSRT data were available for 3201 participants (mean = 258.60, SD = 53.19).                                                                                                                                                                                                                                                                                       |

**Table S2. Detailed information on gut microbiota, serum metabolites, and cognitive phenotype genome-wide association studies (GWAS) data.**

| Trait                     |                     | Sample Size | Population                                                                                                                                                                                                                     | Data source (PMID/DOI)                                                                         |
|---------------------------|---------------------|-------------|--------------------------------------------------------------------------------------------------------------------------------------------------------------------------------------------------------------------------------|------------------------------------------------------------------------------------------------|
| Gut microbiome            | 9 Phyla             | 18340       | European (16 cohorts, N = 13,266), Middle Eastern (1 cohort, N = 481), East Asian (1 cohort, N = 811), American Hispanic/Latin (1 cohort N = 1097), African American (1 cohort, N = 114), multi-ancestry (4 cohorts, N = 2571) | MiBioGen consortium: <a href="http://www.mibiogen.org">www.mibiogen.org</a> (PMID:33462485)    |
|                           | 16 Classes          |             |                                                                                                                                                                                                                                |                                                                                                |
|                           | 20 Orders           |             |                                                                                                                                                                                                                                |                                                                                                |
|                           | 35 Families         |             |                                                                                                                                                                                                                                |                                                                                                |
|                           | 131 Genera          |             |                                                                                                                                                                                                                                |                                                                                                |
| Serum Metabolites         | 452 metabolites     | 7824        | European (German, British)                                                                                                                                                                                                     | IEU open GWAS (ID: met-a-303 ~ met-a-754) (PMID: 24816252)                                     |
| Cognitive traits          | /                   | 257700      | European ancestry individuals                                                                                                                                                                                                  | GWAS catalog: GCST90011875 (PMID: 33414549)                                                    |
| Non-cognitive traits      | /                   | 510795      | European ancestry individuals                                                                                                                                                                                                  | GWAS catalog: GCST90011874 (PMID: 33414549)                                                    |
| Specific cognitive traits | Working memory      | 2471        | European (United Kingdom)                                                                                                                                                                                                      | Avon Longitudinal Study of Parents and Children (DOI: 10.5523/bris.2ux5exb501kds2pq7wv8o6dv85) |
|                           | Response inhibition | 2446        | European (United Kingdom)                                                                                                                                                                                                      | Avon Longitudinal Study of Parents and Children (DOI: 10.5523/bris.2nu9kzcjeyuu72hvi24968pe66) |
|                           | Emotion recognition | 2560        | European (United Kingdom)                                                                                                                                                                                                      | Avon Longitudinal Study of Parents and Children (DOI: 10.5523/bris.2774f89r0hf0a2t76atdeu753c) |

\* Detailed results pertaining to Tables S3-S5 are presented in the accompanying "Supplementary material - Table S3-5" file due to the extensive data
